# Supplementary material for: Extreme summer heat and drought lead to early fruit abortion in European beech
Source: PubMed Central journal article supplement (PMC7093476; doi:10.1038/s41598-020-62073-0), 2020-03-24
Supplement: 41598_2020_62073_MOESM1_ESM.pdf [file 41598_2020_62073_MOESM1_ESM.pdf]

## **SUPPLEMENTARY INFORMATIONS**

### **Extreme summer heat and drought lead to early fruit abortion in European beech**

#### **Authors:**

Anita Nussbaumer<sup>1,2</sup>, Katrin Meusburger<sup>1</sup>, Maria Schmitt<sup>1</sup>, Peter Waldner<sup>1</sup>, Regula Gehrig<sup>3</sup>,  
Matthias Haeni<sup>1</sup>, Andreas Rigling<sup>1,2</sup>, Ivano Brunner<sup>1</sup>, Anne Thimonier<sup>1</sup>

#### **Affiliations:**

1 Swiss Federal Institute for Forest, Snow and Landscape Research WSL, Birmensdorf,  
Switzerland

2 Swiss Federal Institute of Technology ETH, Zurich, Switzerland

3 Federal Office of Meteorology and Climatology MeteoSwiss, Zurich-Flughafen, Switzerland

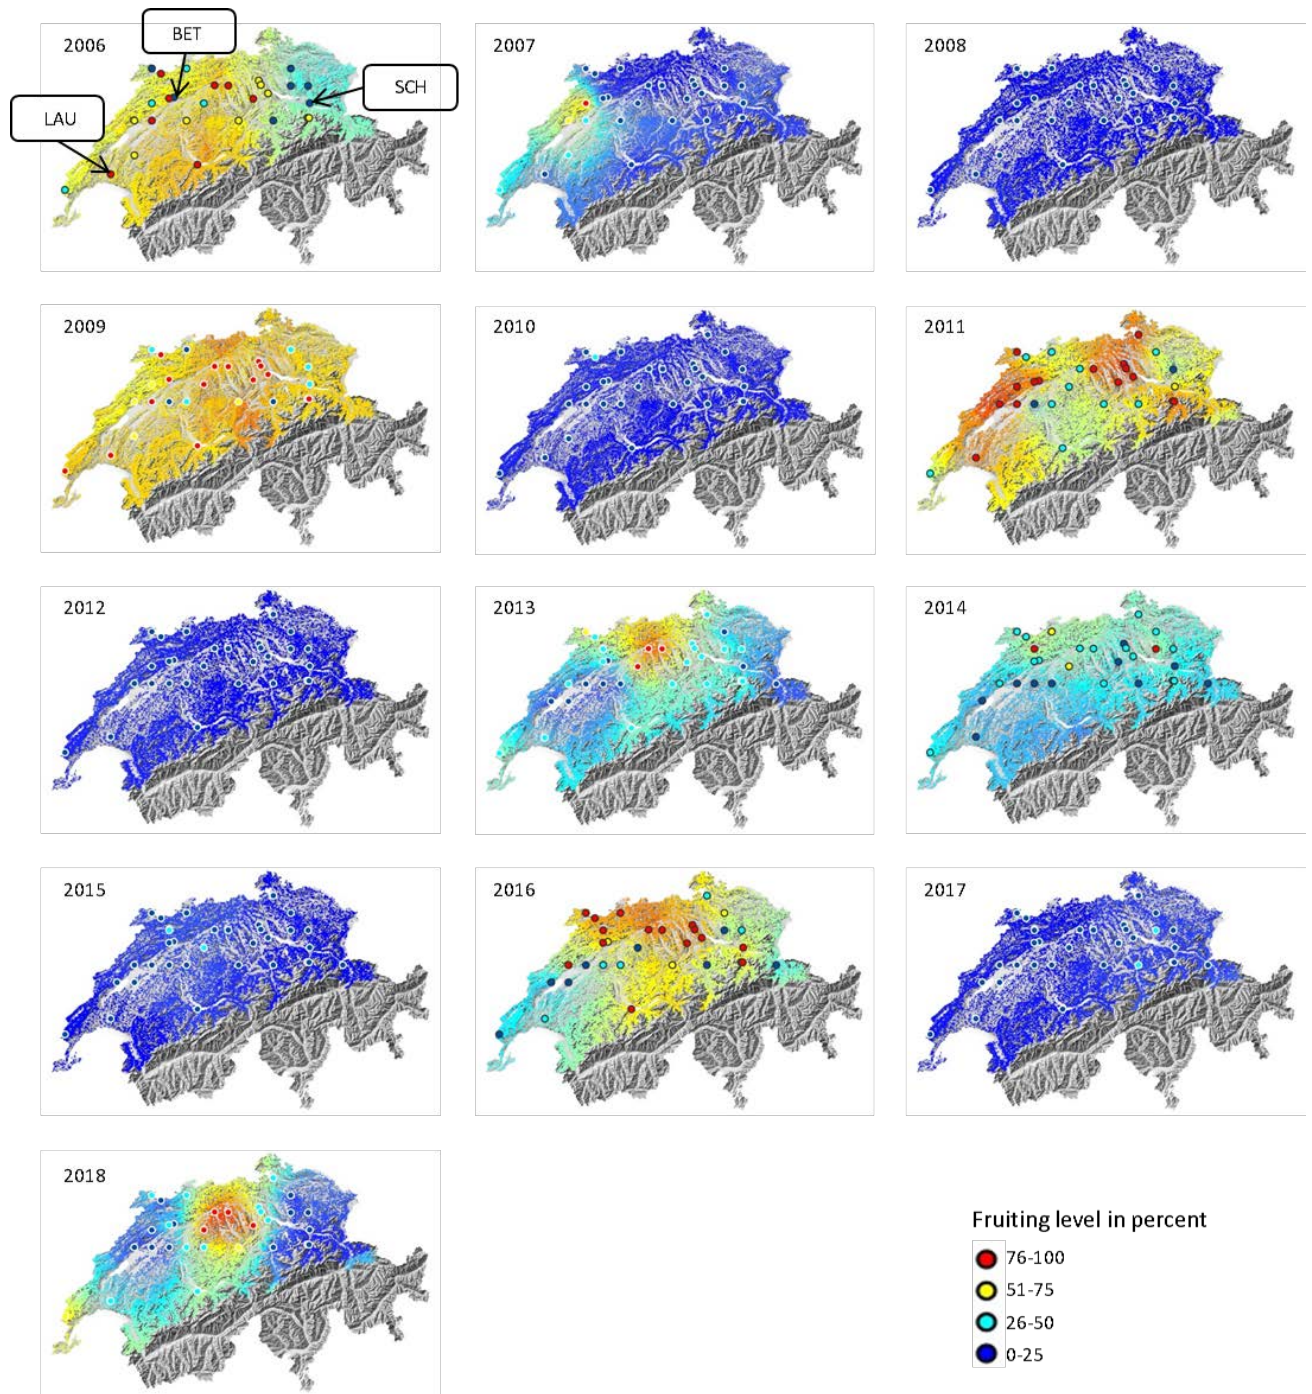

**Figure-S1** European beech fruiting levels from 2006-2018 for the Swiss Plateau, the Prealps, Northern Alps and the Jura Mountains, based on the potential distribution of European beech (Wüest et al.<sup>1</sup>). Measurements on stand scale derive from the Sanasilva programme, the LWF and further stand information (Nussbaumer et al.<sup>2</sup>). BET Bettlachstock, LAU Lausanne, SCH Schänis.

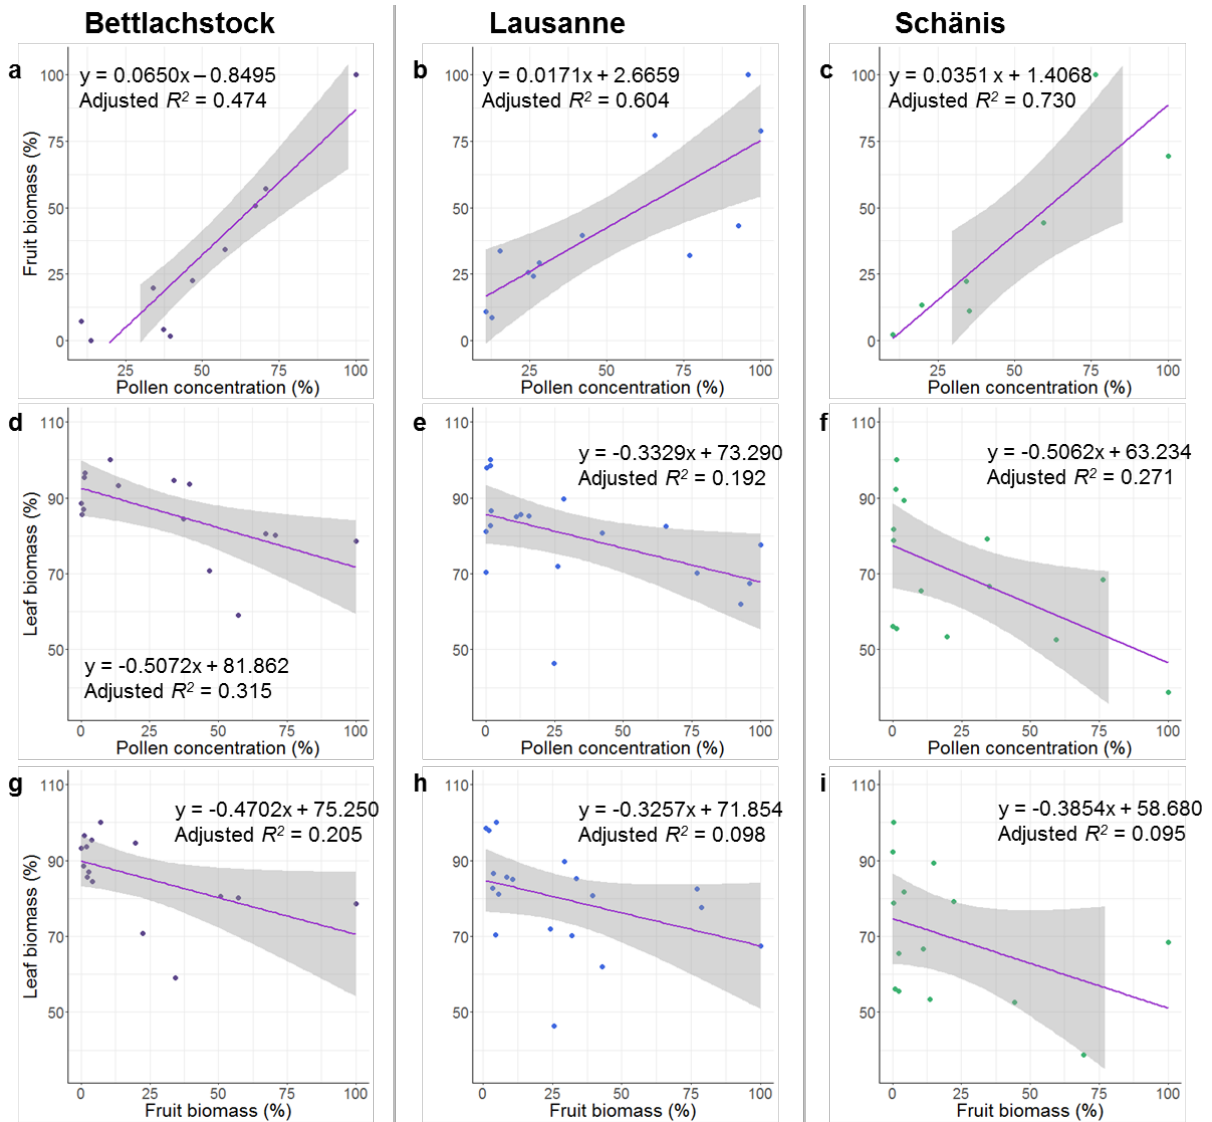

**Figure-S2** Linear regression models of the compartments fruit and leaf biomass, and pollen concentration. Linear regression models of pollen concentration and fruit biomass (**a**, **b**, **c**), leaf biomass and pollen concentration (**d**, **e**, **f**) and leaf biomass and fruit biomass (**g**, **h**, **i**) per site: BET: **a**, **d**, **g**; LAU: **b**, **e**, **h**; SCH: **c**, **f**, **i**. All values in percentage of maximum value per site. For **a** to **c** only measurements with more than 10% of pollen concentration were used, for **d** to **i** all measurements were used. For **a**, **d** and **g**, log-transformed fruit biomass was used. Lines: linear regression lines, grey area: 95% confidence interval. BET Bettlachstock, LAU Lausanne, SCH Schänis.

**Table-S1** Site characteristics for the three investigated sites.

|                                        | <b>Bettlachstock (BET)</b>                       | <b>Lausanne (LAU)</b>             | <b>Schänis (SCH)</b>                             |
|----------------------------------------|--------------------------------------------------|-----------------------------------|--------------------------------------------------|
| Forest type                            | <i>Cardamino-Fagetum tilietosum</i> <sup>a</sup> | <i>Milio-Fagetum</i> <sup>a</sup> | <i>Cardamino-Fagetum tilietosum</i> <sup>a</sup> |
| Main tree species                      | European beech, Silver fir                       | European beech                    | European beech                                   |
| Soil type                              | Rendzic Leptosol                                 | Dystric Cambisol                  | Eutric Cambisol                                  |
| Altitude                               | 1100-1200 m                                      | 800 m                             | 700-770 m                                        |
| Region                                 | Jura                                             | Swiss plateau                     | Prealps                                          |
| Annual mean temperature <sup>b</sup>   | 6.7 °C                                           | 7.8 °C                            | 8.8 °C                                           |
| Annual mean precipitation <sup>b</sup> | 1180 mm                                          | 1120 mm                           | 1820 mm                                          |
| Summer mean temperature <sup>c</sup>   | 14.3 °C                                          | 15.5 °C                           | 16.6 °C                                          |
| Summer mean precipitation <sup>c</sup> | 222 mm                                           | 197 mm                            | 433 mm                                           |
| Litterfall data range                  | 2002-2007, 2010-2018 <sup>d</sup>                | 2000-2018                         | 2005-2018                                        |

<sup>a</sup> according to Ellenberg and Klötzli<sup>3</sup>.

<sup>b</sup> according to LWF data<sup>4, 5</sup>

<sup>c</sup> Average of June, July and August.

<sup>d</sup> incomplete litterfall collection in 2008 and 2009.

**Table-S2** Weather conditions, pollen concentration and fruit biomass in years with fruit abortion and years with most successful mast years on the BET and SCH sites. BET Bettlachstock, SCH Schänis.

| Mast status      | Site           | Year | Precipitation sum stand (mm) |              | Precipitation sum open area (mm) |              | Mean temperature stand (°C) |             | Mean temperature open area (°C) |             | Pollen APIn (pollen day m <sup>-3</sup> ) | Fruits (kg ha <sup>-1</sup> ) |
|------------------|----------------|------|------------------------------|--------------|----------------------------------|--------------|-----------------------------|-------------|---------------------------------|-------------|-------------------------------------------|-------------------------------|
|                  |                |      | Spring                       | Summer       | Spring                           | Summer       | Spring                      | Summer      | Spring                          | Summer      | Spring                                    | Autumn                        |
| Fruit abortion   | <b>BET</b>     | 2002 | 172.1                        | 181.8        | 193.2                            | 229.2        | 7.0                         | 14.4        | 7.8                             | 15.8        | 1812                                      | 123                           |
| Fruit abortion   | <b>BET</b>     | 2003 | 117.8                        | 110.7        | 147.5                            | 133.0        | 9.2                         | 17.1        | 9.0                             | 18.6        | 1641                                      | 597                           |
| Fruit abortion   | <b>BET</b>     | 2018 | 118.8                        | 163.1        | 128.5                            | 224.9        | 10.6                        | 15.4        | 11.5                            | 16.9        | 1912                                      | 53                            |
| Fruit abortion   | <b>SCH</b>     | 2006 | 420.8                        | 139.7        | 478.3                            | 194.5        | 9.3                         | 18.4        | 10.6                            | 19.9        | 1062                                      | 500                           |
| Fruit abortion   | <b>SCH</b>     | 2018 | 160.8                        | 102.6        | 197.9                            | 140.1        | 13.1                        | 18.4        | 13.0                            | 21.8        | 1890                                      | 419                           |
| Fruit abortion   | <b>Average</b> |      | <b>198.1</b>                 | <b>139.6</b> | <b>229.1</b>                     | <b>184.3</b> | <b>9.8</b>                  | <b>16.7</b> | <b>10.4</b>                     | <b>18.6</b> | <b>1663</b>                               | <b>339</b>                    |
| Fruiting success | <b>BET</b>     | 2004 | 129.1                        | 171.9        | 135.2                            | 214.9        | 6.7                         | 13.0        | 7.5                             | 14.3        | 3254                                      | 1534                          |
| Fruiting success | <b>BET</b>     | 2011 | 41.4                         | 150.8        | 61.0                             | 203.2        | 10.6                        | 12.0        | 11.2                            | 12.9        | 4845                                      | 3022                          |
| Fruiting success | <b>BET</b>     | 2014 | 154.2                        | 288.1        | 210.4                            | 369.5        | 7.8                         | 13.7        | 8.5                             | 15.1        | 3428                                      | 1039                          |
| Fruiting success | <b>SCH</b>     | 2011 | 158.4                        | 469.4        | 201.0                            | 559.7        | 12.8                        | 14.7        | 13.7                            | 15.8        | 5372                                      | 2582                          |
| Fruiting success | <b>SCH</b>     | 2016 | 367.2                        | 469.9        | 449.3                            | 597.2        | 9.7                         | 16.1        | 11.0                            | 17.7        | 4101                                      | 3720                          |
| Fruiting success | <b>Average</b> |      | <b>170.0</b>                 | <b>310.0</b> | <b>211.4</b>                     | <b>388.9</b> | <b>9.5</b>                  | <b>13.9</b> | <b>10.4</b>                     | <b>15.2</b> | <b>4200</b>                               | <b>2379</b>                   |

**Table-S3** *t* test results comparing weather conditions in open area between years with fruit abortion and years with fruiting success in European beech. Years with fruit abortion: BET: 2002, 2003, 2018; SCH: 2006, 2018; years with fruiting success: BET: 2004, 2011, 2014; SCH: 2011, 2016. *p* values in bold:  $p < 0.05$ , df degrees of freedom, BET Bettlachstock, SCH Schänis.

| Parameter          | Season            | <i>t</i> value | df   | <i>p</i> value | Mean fruit abortion | Mean fruiting success |
|--------------------|-------------------|----------------|------|----------------|---------------------|-----------------------|
| Precipitation (mm) | Spring            | 0.26           | 8.00 | 0.803          | -13.0               | -30.6                 |
| Precipitation (mm) | Summer            | -2.80          | 6.83 | <b>0.027</b>   | -122.0              | 82.6                  |
| Precipitation (mm) | Spring and summer | -1.73          | 7.89 | 0.123          | -135.0              | 52.0                  |
| Temperature (°C)   | Spring            | -0.03          | 8.00 | 0.980          | 0.4                 | 0.4                   |
| Temperature (°C)   | Summer            | 4.44           | 7.49 | <b>0.003</b>   | 2.1                 | -1.3                  |
| Temperature (°C)   | Spring and summer | 3.00           | 5.13 | <b>0.030</b>   | 1.2                 | -0.5                  |

**Table-S4** Best fitting regression models for the impact of weather conditions on pollen concentration and fruit production of European beech stands. Meteorological measurements from open area stations, deviations from long-term mean. Basic model: includes summer (June and July) mean temperatures and precipitation sums of the two years before the target year, and spring (April and May) mean temperatures and precipitation sums of the target year.  $\Delta T$  model: includes difference between summer (June and July) temperatures of the two years before the target year, summer precipitation sums of the two years before the target year, and spring (April and May) mean temperatures and precipitation sums of the target year. xxx: parameter not part of the model.  $\searrow$  = lower than average,  $\nearrow$  = higher than average,  $\Delta$  = summer temperature difference relevant, 0 = not included in the best fitting model.  $R^2$  from linear regression models.

| Generative variable | Model      | $R^2$ | Difference of summer temperatures 1 and 2 years before target year | 2 years before target year (summer) |               | 1 year before target year (summer) |               | target year (spring) |               |
|---------------------|------------|-------|--------------------------------------------------------------------|-------------------------------------|---------------|------------------------------------|---------------|----------------------|---------------|
|                     |            |       |                                                                    | Temperature                         | Precipitation | Temperature                        | Precipitation | Temperature          | Precipitation |
| Pollen              | Basic      | 0.41  | xxx                                                                | $\searrow$                          | 0             | $\nearrow$                         | 0             | 0                    | $\searrow$    |
| Fruits              | Basic      | 0.30  | xxx                                                                | 0                                   | $\nearrow$    | 0                                  | $\searrow$    | 0                    | 0             |
| Pollen              | $\Delta T$ | 0.41  | $\Delta$                                                           | xxx                                 | 0             | xxx                                | 0             | 0                    | 0             |
| Fruits              | $\Delta T$ | 0.30  | 0                                                                  | xxx                                 | $\nearrow$    | xxx                                | $\searrow$    | 0                    | 0             |

**Table-S5** Relations between pollen and litterfall measurements at Swiss and site scale, calculated with linear regression models. In models where fruit biomass was the dependent variable, it was log-transformed. Leaves next year = leaf production in the subsequent year, % = percentage of pollen concentration, all = measurements of all three sites.

| Dependent variable | Predictor | Data range    | Measured years | Adjusted $R^2$ | $p$ value        | Relation |
|--------------------|-----------|---------------|----------------|----------------|------------------|----------|
| Fruits             | Pollen    | Bettlachstock | 10             | 0.474          | <b>0.017</b>     | positive |
| Leaves             | Pollen    | Bettlachstock | 15             | 0.315          | <b>0.017</b>     | negative |
| Leaves             | Fruits    | Bettlachstock | 15             | 0.205          | 0.051            | negative |
| Leaves next year   | Pollen    | Bettlachstock | 14             | 0.084          | 0.165            | none     |
| Leaves next year   | Fruits    | Bettlachstock | 14             | -0.020         | 0.401            | none     |
| Fruits             | Pollen    | Lausanne      | 12             | 0.604          | <b>0.012</b>     | positive |
| Leaves             | Pollen    | Lausanne      | 19             | 0.192          | <b>0.035</b>     | negative |
| Leaves             | Fruits    | Lausanne      | 19             | 0.098          | 0.103            | negative |
| Leaves next year   | Pollen    | Lausanne      | 18             | -0.049         | 0.657            | none     |
| Leaves next year   | Fruits    | Lausanne      | 18             | -0.059         | 0.814            | none     |
| Fruits             | Pollen    | Schänis       | 7              | 0.730          | <b>0.009</b>     | positive |
| Leaves             | Pollen    | Schänis       | 14             | 0.271          | <b>0.033</b>     | negative |
| Leaves             | Fruits    | Schänis       | 14             | 0.095          | 0.151            | none     |
| Leaves next year   | Pollen    | Schänis       | 13             | -0.058         | 0.572            | none     |
| Leaves next year   | Fruits    | Schänis       | 13             | -0.035         | 0.457            | none     |
| Fruits             | Pollen    | All, 10-100%  | 29             | 0.366          | <b>&lt;0.001</b> | positive |
| Fruits             | Pollen    | All, 40-99%   | 11             | 0.240          | 0.072            | positive |
| Leaves             | Pollen    | All           | 48             | 0.237          | <b>&lt;0.001</b> | negative |
| Leaves             | Fruits    | All           | 48             | 0.146          | <b>0.004</b>     | negative |
| Leaves next year   | Pollen    | All           | 44             | 0.033          | 0.121            | none     |
| Leaves next year   | Fruits    | All           | 44             | 0.009          | 0.246            | none     |

## References

1. Wüest, R. O., Bergamini, A., Bollmann, K. & Baltensweiler, A. LiDAR data as a proxy for light availability improve distribution modelling of woody species. *For. Ecol. Manag.* **456**, 117644 (2019). 10.1016/j.foreco.2019.117644
2. Nussbaumer, A. et al. Patterns of mast fruiting of common beech, sessile and common oak, Norway spruce and Scots pine in Central and Northern Europe. *For. Ecol. Manag.* **363**, 237-251 (2016).
3. Ellenberg, H. & Klötzli, F. Waldgesellschaften und Waldstandorte der Schweiz. Mitt. Schweiz. Anst. Forstl. Vers.w. 48, 589-930 (1972).
4. Rebetez, M. et al. Meteorological data series from Swiss long-term forest ecosystem research plots since 1997. *Ann. For. Sci.* **75**, 41-48 (2018).
5. Thimonier, A. et al. Total deposition of nitrogen in Swiss forests: comparison of assessment methods and evaluation of changes over two decades. *Atmos. Environ.* **198**, 335-350 (2019).
